# Supplementary material for: Lamivudine salts with 1,2-dicarboxylic acids: A new and a rare synthon with double pairing motif fine-tuning their solubility
Source: Royal Society of Chemistry journal article supplement (doi:10.1039/c3ce40844b), 2013-01-01
Supplement: c3ce40844b.pdf [file c3ce40844b.pdf]

## Supplementary Information

### Lamivudine salts with 1,2-dicarboxylic acids: a new and a rare synthon with double pairing motif fine-tuning their solubility

*Cameron Capeletti da Silva, Marilia de Lima Cirqueira, and Felipe Terra Martins\**

Instituto de Química, Universidade Federal de Goiás, Campus Samambaia, CP 131, 74001-970, Goiânia, GO, Brazil

\*E-mail: felipe@quimica.ufg.br

#### Content:

- 1. Figure S1** exhibits the ellipsoid plot of the asymmetry unit of lamivudine hydrogen phthalate hemihydrate.....S1
- 2. Figure S2** displays the ellipsoid plot of the asymmetric unit of lamivudine hydrogen 4,5-dichlorophthalate.....S2

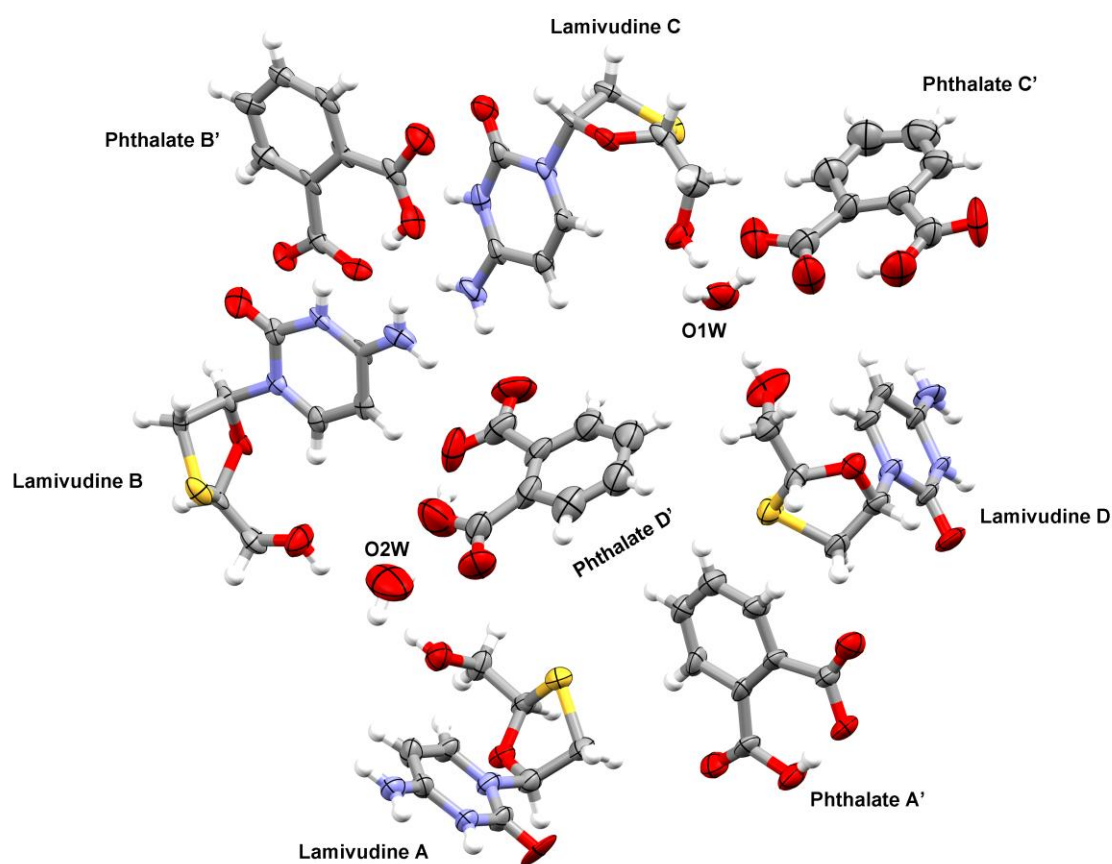

**Figure S1.** Ellipsoid plot (50 % probability) of the asymmetry unit of lamivudine hydrogen phthalate hemihydrate. Hydrogen atoms are shown as arbitrary radius spheres. The atom's names follow the same pattern of our previous articles on lamivudine crystal structures (see references 6-8 and 10-11 in the main body of the paper).

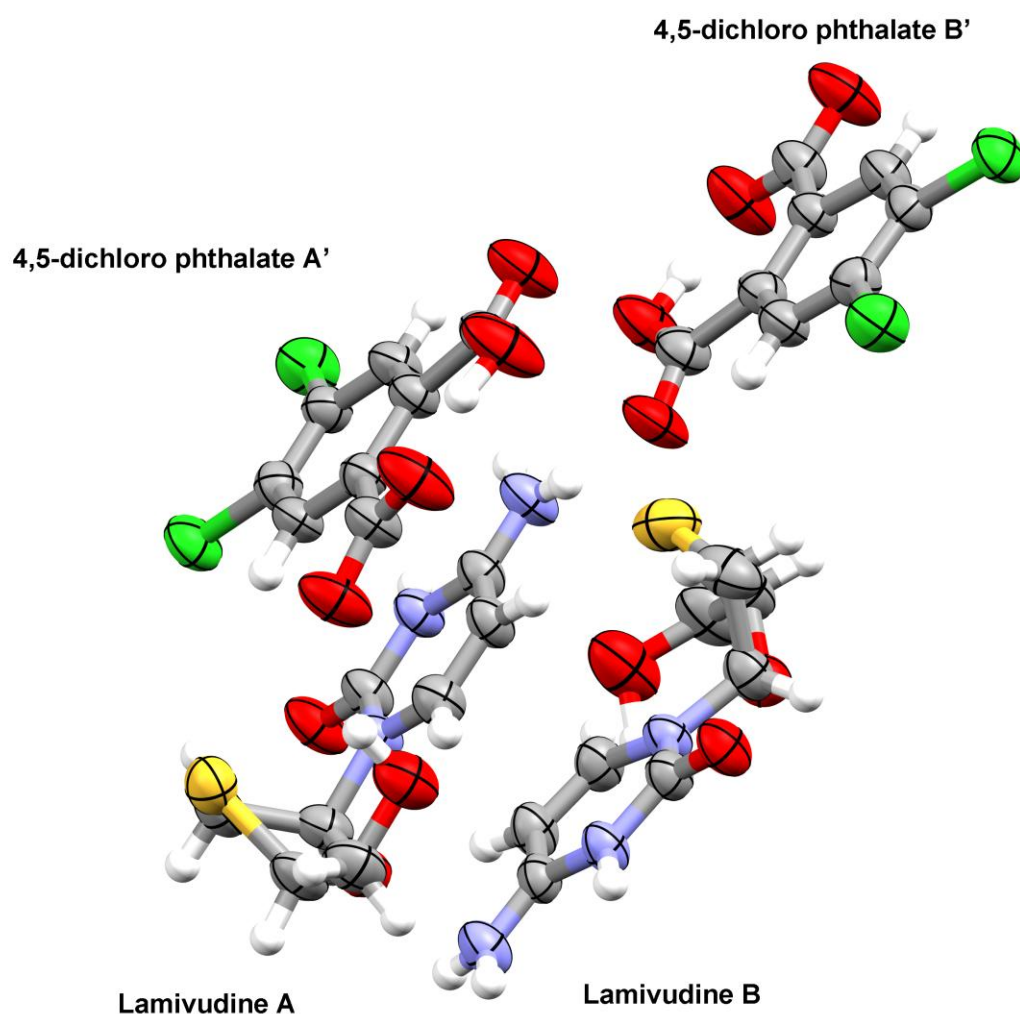

**Figure S2.** Ellipsoid plot (50 % probability) of the asymmetry unit of lamivudine hydrogen 4,5-dichlorophthalate. Hydrogens atoms are shown as arbitrary radius spheres. The atom's names follow the same pattern of our previous articles on lamivudine crystal structures (see references 6-8 and 10-11 in the main body of the paper).
